# Supplementary material for: An Association between Pancreatic and Cholestatic Biliary Disorders in Dogs
Source: MDPI journal article supplement (doi:10.3390/ani14050795), 2024-03-04
Supplement: s1 [file s1]

**Supplementary Table S1.** Raw data of signalment and biochemical parameters of the study population. Reference intervals of the biochemical parameters are reported in square brackets.

| Subject | Sex | Age  | Breed                | Total bilirubin<br>[0-0.3 mg/dL] | Cholesterol<br>[128-280 mg/dL] | Triglycerides<br>[25-90 mg/dL] | ALP<br>[45-250 U/L] | GGT<br>[2-11 U/L] | ALT<br>[20-70 U/L] | DGGR lipase<br>[<143U/L] |
|---------|-----|------|----------------------|----------------------------------|--------------------------------|--------------------------------|---------------------|-------------------|--------------------|--------------------------|
| 1       | F   | 11.4 | Welsh Terrier        | 44.9                             | 777.0                          | 347                            | 13570               | 157.0             | 287.3              | 18                       |
| 2       | M   | 0.4  | German Shepherd      | 0.1                              | 341.9                          | 92                             | 355                 | 0.3               | 44.5               | 21                       |
| 3       | F   | 11.1 | Mixed breed          | 1.7                              | 385.5                          | 164                            | 865                 | 3.8               | 22.8               | 25                       |
| 4       | F   | 5.9  | Fox Terrier          | 0.5                              | 481.8                          | 90                             | 134                 | 4.3               | 41.2               | 26                       |
| 5       | MC  | 10.9 | Boston Terrier       | 0.1                              | 453.9                          | 89                             | 270                 | 15.2              | 106.9              | 26                       |
| 6       | F   | 0.3  | Border Collie        | 0.3                              | 378.5                          | 95                             | 326                 | 2.7               | 11.0               | 29                       |
| 7       | MC  | 11.1 | Jack Russel Terrier  | 0.4                              | 544.4                          | 147                            | 439                 | 10.3              | 58.3               | 30                       |
| 8       | M   | 2.8  | Mixed breed          | 0.7                              | 307.0                          | 56                             | 746                 | 20.9              | 88.4               | 37                       |
| 9       | M   | 10.9 | Labrador Retriever   | 2.5                              | 314.4                          | 392                            | 558                 | 1.0               | 84.8               | 41                       |
| 10      | M   | 1.7  | Collie               | 0.3                              | 241.8                          | 50                             | 277                 | 1.1               | 48.3               | 42                       |
| 11      | M   | 9.4  | Schnauzer            | 0.3                              | 213.4                          | 124                            | 2551                | 388.0             | 200.6              | 45                       |
| 12      | F   | 9.3  | Labrador Retriever   | 6.4                              | 370.8                          | 117                            | 3059                | 89.6              | 1233.4             | 46                       |
| 13      | M   | 5.7  | Border Collie        | 0.5                              | 310.7                          | 118                            | 4575                | 21.0              | 93.0               | 48                       |
| 14      | M   | 1.1  | Golden Retriever     | 0.2                              | 446.5                          | 53                             | 265                 | 0.8               | 100.1              | 49                       |
| 15      | M   | 12.7 | Jack Russel Terrier  | 0.2                              | 379.4                          | 65                             | 3814                | 509.0             | 2316.5             | 50                       |
| 16      | M   | 6.8  | Belgian Shepherd     | 0.3                              | 338.9                          | 95                             | 109                 | 3.0               | 49.4               | 50                       |
| 17      | MC  | 9.1  | Mixed breed          | 3.3                              | 619.7                          | 108                            | 821                 | 36.1              | 1024.9             | 50                       |
| 18      | F   | 2.0  | Labrador Retriever   | 0.9                              | 309.0                          | 190                            | 716                 | 1.7               | 1549.0             | 51                       |
| 19      | MC  | 15.7 | Labrador Retriever   | 0.0                              | 285.4                          | 36                             | 6283                | 1.1               | 3747.0             | 52                       |
| 20      | M   | 1.8  | Beagle               | 0.3                              | 404.1                          | 27                             | 583                 | 2.0               | 39.6               | 57                       |
| 21      | FS  | 9.1  | Chihuahua            | 0.3                              | 316.0                          | 187                            | 382                 | 3.9               | 69.3               | 59                       |
| 22      | M   | 1.2  | Labrador Retriever   | 0.4                              | 190.6                          | 50                             | 934                 | 56.1              | 674.9              | 60                       |
| 23      | FS  | 8.2  | Maltese              | 0.7                              | 482.8                          | 92                             | 4048                | 3.9               | 60.5               | 61                       |
| 24      | M   | 6.3  | Labrador Retriever   | 3.4                              | 342.7                          | 118                            | 2509                | 39.6              | 220.3              | 63                       |
| 25      | FS  | 10.2 | West Highland W. T.  | 0.4                              | 269.0                          | 69                             | 866                 | 10.7              | 324.2              | 68                       |
| 26      | M   | 3.2  | French Bulldog       | 0.4                              | 93.0                           | 50                             | 1937                | 24.3              | 954.0              | 71                       |
| 27      | FS  | 10.9 | Maremma sheep dog    | 0.5                              | 401.4                          | 92                             | 575                 | 4.8               | 131.7              | 78                       |
| 28      | F   | 12.4 | Pincher              | 0.3                              | 302.9                          | 175                            | 280                 | 4.3               | 228.2              | 79                       |
| 29      | M   | 10.2 | Mixed breed          | 0.1                              | 415.1                          | 125                            | 332                 | 43.1              | 161.7              | 82                       |
| 30      | F   | 7.0  | Bernese Mounting dog | 0.3                              | 278.4                          | 114                            | 344                 | 7.6               | 68.9               | 83                       |
| 31      | FS  | 3.8  | Mixed breed          | 0.3                              | 394.0                          | 160                            | 122                 | 1.4               | 41.2               | 86                       |
| 32      | F   | 5.9  | Mixed breed          | 0.5                              | 217.6                          | 63                             | 293                 | 9.1               | 182.3              | 87                       |
| 33      | M   | 7.5  | Cane corso           | 0.3                              | 455.5                          | 94                             | 832                 | 2.3               | 35.1               | 89                       |
| 34      | FS  | 5.7  | Mixed breed          | 0.5                              | 401.7                          | 86                             | 502                 | 9.7               | 213.3              | 92                       |
| 35      | M   | 9.2  | German Shepherd      | 0.3                              | 300.6                          | 241                            | 863                 | 1.7               | 89.9               | 100                      |
| 36      | FS  | 11.9 | Jack Russel Terrier  | 0.7                              | 310.6                          | 122                            | 5203                | 74.3              | 633.8              | 107                      |
| 37      | M   | 8.8  | Mixed breed          | 0.6                              | 265.9                          | 359                            | 747                 | 7.0               | 156.5              | 113                      |
| 38      | M   | 9.6  | Cane corso           | 0.5                              | 303.0                          | 98                             | 2090                | 6.6               | 62.8               | 113                      |

|    |    |      |                               |      |       |     |       |       |        |     |
|----|----|------|-------------------------------|------|-------|-----|-------|-------|--------|-----|
| 39 | F  | 13.2 | Mixed breed                   | 0.3  | 163.8 | 62  | 110   | 10.1  | 193.5  | 114 |
| 40 | M  | 6.4  | Cocker Spaniel                | 0.3  | 378.9 | 92  | 235   | 0.3   | 40.1   | 122 |
| 41 | MC | 6.2  | Maltese                       | 0.4  | 168.2 | 212 | 1671  | 5.6   | 98.5   | 122 |
| 42 | FS | 6.7  | German Shepherd               | 0.5  | 356.9 | 107 | 172   | 4.0   | 46.4   | 122 |
| 43 | F  | 13.3 | Dachshund                     | 0.2  | 218.5 | 85  | 393   | 29.2  | 59.0   | 128 |
| 44 | F  | 15.0 | Dachshund                     | 0.2  | 334.0 | 63  | 285   | 6.0   | 212.8  | 134 |
| 45 | M  | 13.6 | Jack Russel Terrier           | 0.2  | 401.0 | 45  | 841   | 8.2   | 229.9  | 143 |
| 46 | FS | 10.1 | Mixed breed                   | 0.4  | 150.0 | 5   | 2902  | 7.8   | 34.6   | 143 |
| 47 | F  | 10.9 | Rhodesian Ridgeback           | 0.3  | 290.5 | 49  | 343   | 2.2   | 84.5   | 144 |
| 48 | M  | 9.9  | Cavalier King Charles Spaniel | 0.2  | 673.4 | 130 | 2934  | 77.1  | 399.0  | 163 |
| 49 | FS | 10.5 | Alaskan Malamute              | 0.4  | 425.0 | 95  | 2111  | 11.2  | 488.0  | 200 |
| 50 | F  | 10.5 | Greater Swiss mountain dog    | 0.2  | 486.4 | 148 | 271   | 4.0   | 67.5   | 204 |
| 51 | FS | 10.4 | Cocker Spaniel                | 0.3  | 212.7 | 71  | 1068  | 7.9   | 153.2  | 206 |
| 52 | FS | 11.1 | Mixed breed                   | 0.2  | 302.7 | 84  | 4223  | 4.4   | 260.5  | 206 |
| 53 | F  | 10.8 | German Shepherd               | 0.4  | 302.1 | 270 | 193   | 3.3   | 37.9   | 223 |
| 54 | FS | 15.0 | Dachshund                     | 0.2  | 424.0 | 47  | 2076  | 31.8  | 79.3   | 234 |
| 55 | FS | 8.2  | Flat Coted Retriever          | 0.7  | 81.4  | 32  | 941   | 2.2   | 221.0  | 235 |
| 56 | FS | 3.7  | Mixed breed                   | 4.8  | 129.1 | 135 | 725   | 16.4  | 134.7  | 236 |
| 57 | FS | 16.9 | Mixed breed                   | 10.4 | 395.0 | 285 | 19170 | 161.0 | 2726.4 | 249 |
| 58 | M  | 4.8  | Dobermann                     | 0.5  | 318.8 | 92  | 809   | 4.9   | 100.9  | 261 |
| 59 | M  | 8.2  | English Setter                | 0.4  | 234.0 | 60  | 294   | 6.7   | 116.0  | 272 |
| 60 | M  | 5.7  | Border Collie                 | 0.4  | 242.0 | 50  | 310   | 6.3   | 96.0   | 291 |
| 61 | MC | 3.3  | French Bulldog                | 2.7  | 101.0 | 106 | 741   | 11.5  | 408.6  | 294 |
| 62 | FS | 8.7  | Pincher                       | 0.3  | 171.8 | 50  | 390   | 4.3   | 57.4   | 305 |
| 63 | FS | 9.5  | Mixed breed                   | 0.2  | 412.0 | 52  | 1252  | 4.0   | 32.9   | 312 |
| 64 | MC | 10.4 | Mixed breed                   | 0.7  | 424.5 | 276 | 1398  | 7.9   | 105.1  | 322 |
| 65 | FS | 6.1  | Australian Shepherd           | 1.3  | 183.0 | 106 | 6202  | 23.7  | 79.0   | 324 |
| 66 | M  | 12.2 | German Shepherd               | 0.4  | 228.1 | 155 | 959   | 10.3  | 334.7  | 332 |
| 67 | FS | 13.7 | Pincher                       | 0.3  | 466.7 | 102 | 7300  | 15.9  | 1843.4 | 339 |
| 68 | F  | 15.8 | Shih Tzu                      | 0.4  | 353.3 | 92  | 304   | 4.3   | 56.9   | 355 |
| 69 | FS | 12.1 | Pincher                       | 0.4  | 183.4 | 121 | 2254  | 13.9  | 243.3  | 378 |
| 70 | M  | 11.5 | Springer Spaniel              | 0.3  | 456.6 | 100 | 520   | 8.5   | 114.1  | 387 |
| 71 | FS | 12.0 | Cocker Spaniel                | 0.4  | 492.8 | 87  | 3296  | 27.2  | 508.0  | 417 |
| 72 | FS | 11.5 | Mixed breed                   | 0.7  | 422.7 | 85  | 493   | 1.8   | 97.3   | 418 |
| 73 | MC | 11.7 | Yorkshire                     | 0.6  | 249.4 | 145 | 3784  | 306.1 | 731.1  | 419 |
| 74 | M  | 14.5 | Golden Retriever              | 0.2  | 364.9 | 92  | 907   | 4.0   | 90.7   | 432 |
| 75 | F  | 7.1  | English Setter                | 0.2  | 299.1 | 52  | 407   | 2.7   | 60.4   | 618 |
| 76 | F  | 6.1  | Bernese Mounting dog          | 1.8  | 103.0 | 78  | 1428  | 2.2   | 1152.0 | 620 |
| 77 | FS | 7.6  | Mixed breed                   | 4.1  | 305.5 | 171 | 213   | 0.0   | 73.1   | 655 |
| 78 | M  | 10.6 | Labrador Retriever            | 13.6 | 694.8 | 310 | 7899  | 40.4  | 1258.0 | 702 |
| 79 | M  | 2.5  | Mixed breed                   | 1.9  | 30.6  | 12  | 1070  | 4.0   | 3474.8 | 738 |
| 80 | F  | 4.8  | Chihuahua                     | 0.5  | 277.0 | 117 | 810   | 2.1   | 50.3   | 747 |

|    |    |     |             |     |       |    |     |     |      |      |
|----|----|-----|-------------|-----|-------|----|-----|-----|------|------|
| 81 | FS | 8.6 | Mixed breed | 0.7 | 364.0 | 86 | 740 | 4.3 | 63.0 | 4668 |
|----|----|-----|-------------|-----|-------|----|-----|-----|------|------|
